# Supplementary material for: YY1’s role in the Peg3 imprinted domain
Source: PubMed Central journal article supplement (PMC5526879; doi:10.1038/s41598-017-06817-5), 2017-07-25

# YY1's roles in the Peg3 imprinted domain

Hongzhi He, An Ye, Bambarendage P.U. Perera, Joomyeong Kim

Department of Biological sciences, Louisiana State University,  
Baton Rouge, LA 70803, USA

# Hhe\_Supplemental\_material\_1

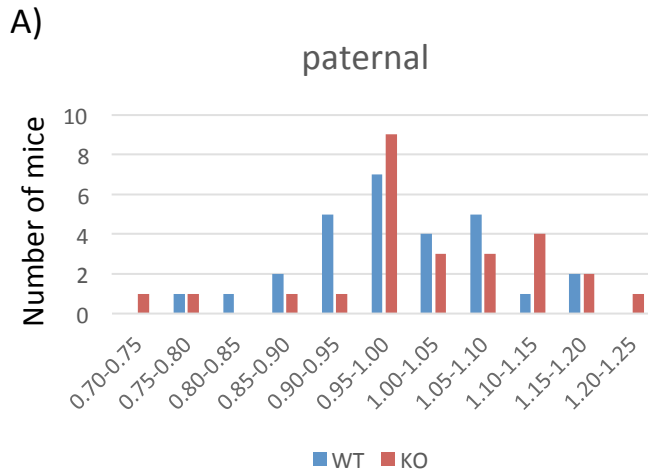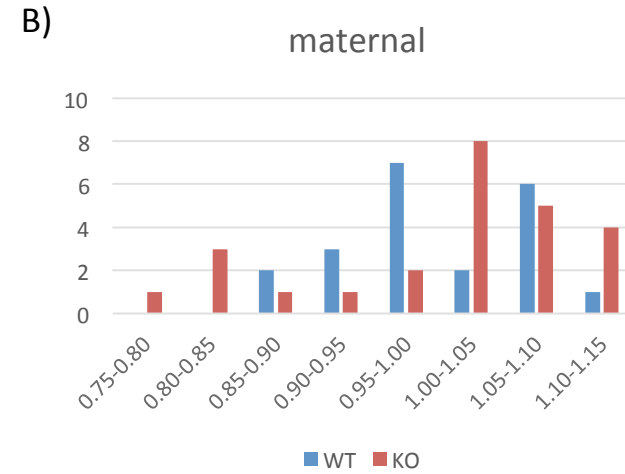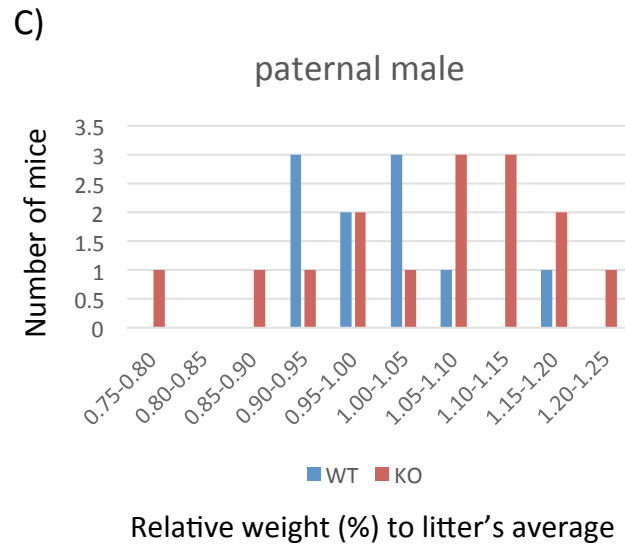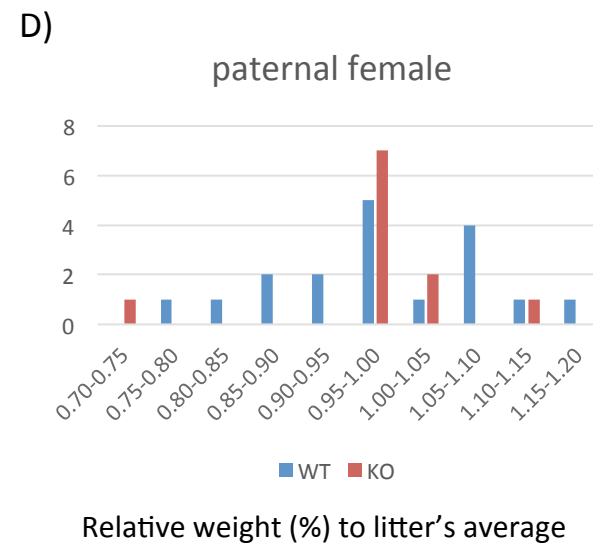

**Supplemental material 1.** Male and female heterozygotes were individually bred with their wild-type littermates for the paternal and maternal transmission of the mutant allele (**A,B**). The weight profiles of the pups with the paternal transmission of the mutant allele were divided based on their sexes, and subsequently re-analyzed (**C,D**).

## Hhe\_Supplemental\_material\_2

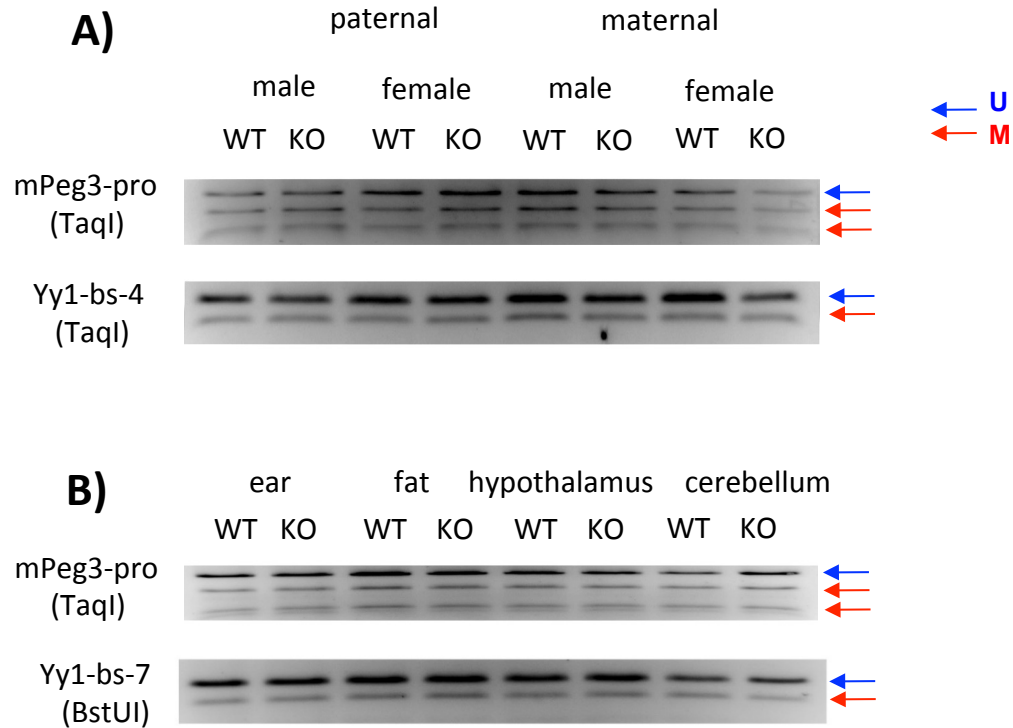

**Supplemental material 2.** DNA methylation analyses using the DNA isolated from the neonatal brains of wild type (WT) and knockout (KO) mice with the paternal and maternal transmission of the mutant allele (**A**). DNA methylation analyses using the tissues of adult mice with the maternal transmission of the mutant allele (**B**).

♀ Pwd X ♂ 129/B6

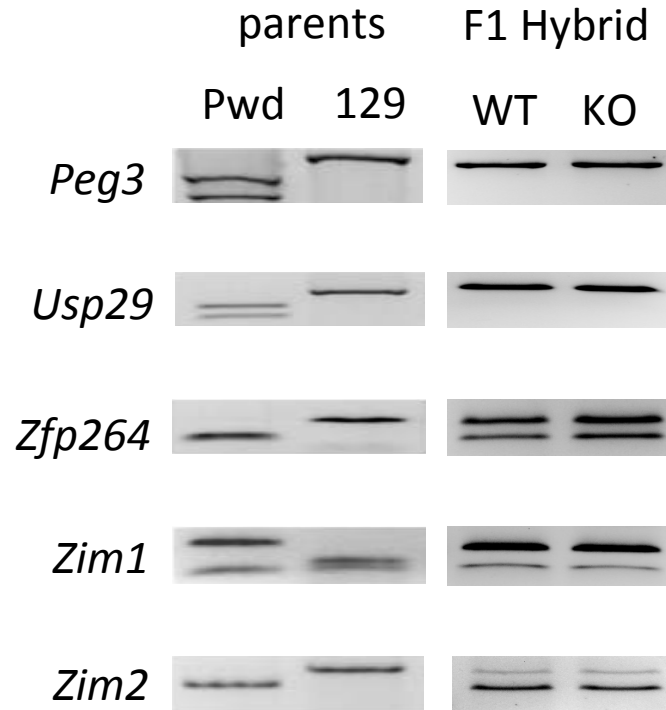

**Supplemental material 3.** The one-day-old heads of F1 hybrids from the crossing between the male KO of 129/B6 and the female breeders of Pwd were used for imprinting test. The digestion patterns for the 5 tested genes from the two parental alleles are shown on the two left columns, while the two right columns are the results from the F1 hybrids. The results indicated no major changes in the imprinting status of the 5 imprinted genes between WT and KO with the paternal transmission of the mutant allele.

# Hhe\_Supplemental\_material\_4

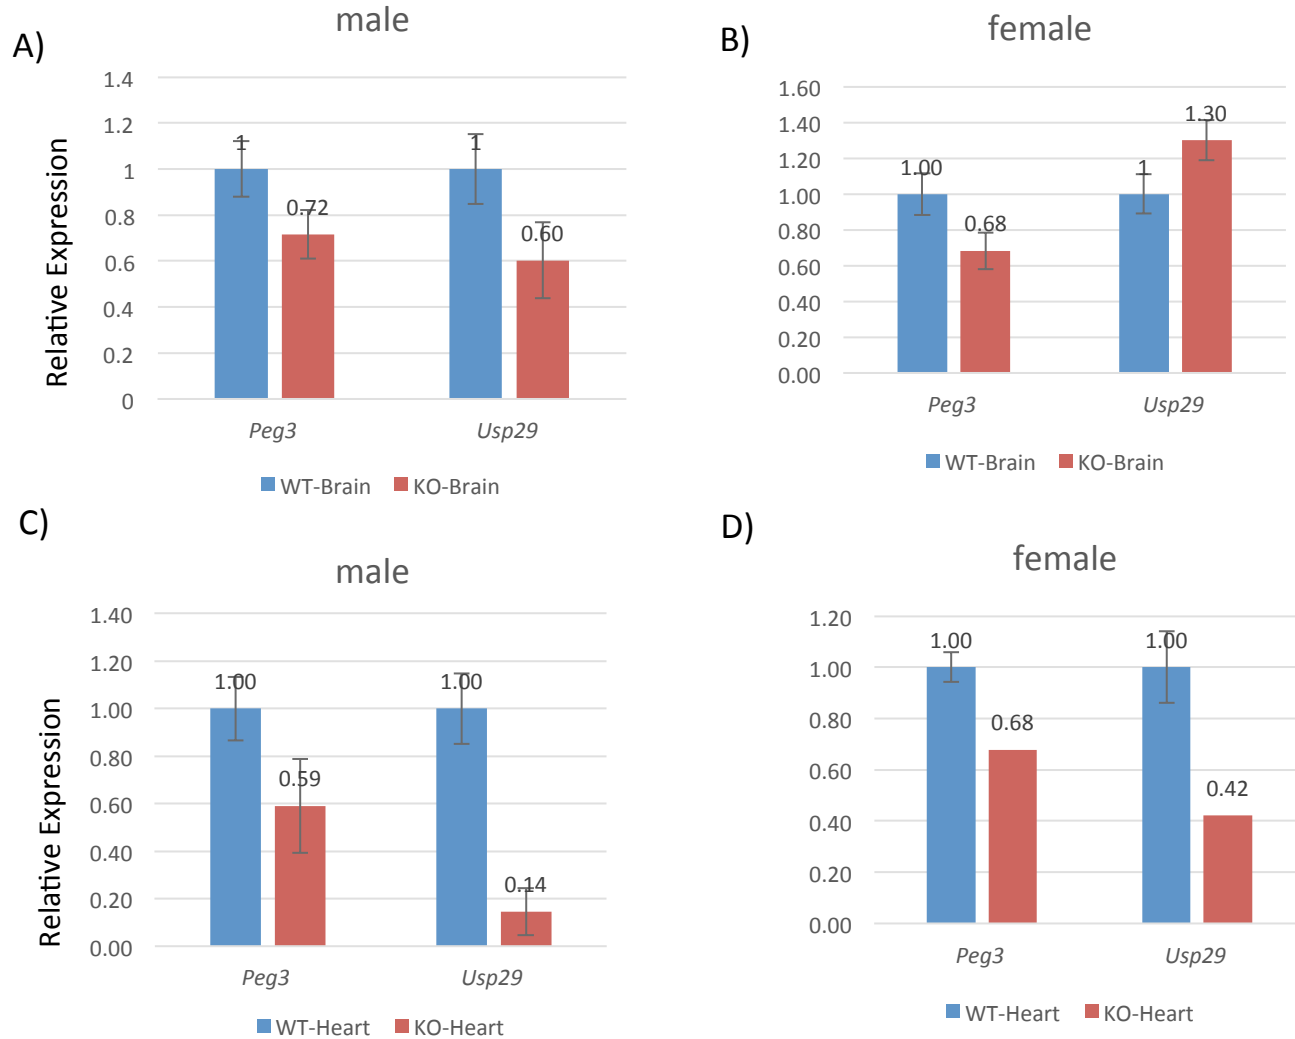

**Supplemental material 4.** Mutational effects on the expression levels of *Peg3* and *Usp29* in the brains and hearts of the 2-month-old mice with the paternal transmission of the mutant allele. The series of analyses were repeated with two independent sets of biological replicates.

**Supplementary Material 5. Primer sets used for imprinting test.**

| Locus  | Name                                 | Sequence (5' -> 3')                                  | Primer set | Size (bp) | Genbank No:Position     | RFLP enzyme (cut vs uncut) |
|--------|--------------------------------------|------------------------------------------------------|------------|-----------|-------------------------|----------------------------|
| Peg3   | Peg3-RT1-1a<br>Peg3-RT-1b.3          | GGTTCAGTGTGGGTGCACTAGACT<br>TCCCTAGTGTGCATGATCTGGT   | 1st primer | 1319      | NM_008817:93-1411       | BstUI (PWD vs 129)         |
| Usp29  | Usp29-RT-Pol-a<br>Usp29-RT-Pol-b.1   | GAGCCTGCAGCCGGACCGT<br>GCTGCGGATCTGGACCAACCA         | 1st primer | 329       | NM_021323:972-1300      | Tsp45I (PWD vs 129)        |
| Zim1   | Zim1-F1<br>Zim1-F2                   | GAATTCACACGGGAGTGAGA<br>CTTGACCCGGTACTGGAGT          | 1st primer | 539       | NM_011769:1357-1895     | DraI (PWD vs 129)          |
| Zim2   | Zim2-17<br>Zim2-19                   | GCTCAGGACCTGCGCTTTCAG<br>GGGCTGCCAAGATCAATGCTG       | 1st primer | 538       | AF401983:57-594         | BstUI (PWD vs 129)         |
| Zim3   | Zim3-RT-Pol-a<br>Zim3-RT-Pol-b.1     | CCCTTACTGACCTAGGGCTTG<br>AGTGACGCTCTCAAGGTCACT       | 1st primer | 269       | NR_036631.2<br>:101-369 | EcoRV (129 vs PWD)         |
| Zfp264 | Zfp264-RT-Pol-b.1<br>Zfp264-RT-Pol-b | CTGGGCATGAAAAGATCCACT<br>CCACATTTGTTGCACTGGTGGAT     | 1st primer | 229       | AF365933:404-632        | BstUI (PWD vs 129)         |
| Apeg3  | APeg3-R<br>APeg3-F                   | GCACCAAGTGCAGGTGGTGCAGGA<br>CAATCAGTCTCAAGGGGTCTGGGT | 1st primer | 865       | NR_023846:1-865         | XhoI (PWD vs 129)          |
|        |                                      |                                                      |            |           |                         |                            |

**Supplementary Table 2. Primer sets used for the bisulfite sequencing and COBRA.**

| Locus    | Name                                                  | Sequence (5' -> 3')                                                                              | Primer set          | Size (bp) | *Position (mm10, NCBI Build 38) |
|----------|-------------------------------------------------------|--------------------------------------------------------------------------------------------------|---------------------|-----------|---------------------------------|
| Peg3-pro | Peg3-pro-a                                            | AATAGTAGTTTGGTGGTGGGGA                                                                           | 1st primer          | 380       | chr7: 6730175-6730555           |
|          | Peg3-pro-b                                            | CACCCAAACACCATCTAACTCACAAC                                                                       | 2nd primer (Nested) | 292       | chr7: 6730175-6730467           |
|          | Peg3-pro-a.1<br>Peg3-pro-b                            | GTTTTGTAGAGGATTTGATAAGGAG<br>CACCCAAACACCATCTAACTCACAAC                                          |                     |           |                                 |
| Yy1-bs-2 | Yy1-15                                                | AGGAAGAGTTAGAGGAGTTAGTTTTATAGA                                                                   | 1st primer          | 509       | chr7: 6729374-6729883           |
|          | Yy1-16.1                                              | CCTATTACAAAACCAACAATAAACATCA                                                                     | 2nd primer (Nested) | 345       | chr7: 6729538-6683362           |
|          | Yy1-15.2<br>Yy1-16.bis2 (for KO)<br>Yy1-16.1 (for WT) | TAGGTAGTTAATTAGGATAAGTTGTGTAG<br>TTCTATCTTTCTAAAAATAAAAACTTC<br>CCTATTACAAAACCAACAATAAACATCA     |                     |           |                                 |
| Yy1-bs-4 | Yy1-19                                                | TTTTATGGGTTTGTGAAGTTTTAG                                                                         | 1st primer          | 216       | chr7: 6728371-6728587           |
|          | Yy1-22                                                | CAAATCCCAACCCCAACCACTATC                                                                         | 2nd primer (Nested) | 204       | chr7: 6728383-6728587           |
|          | Yy1-19<br>Yy1-20                                      | TTTTATGGGTTTGTGAAGTTTTAG<br>CCAACCACTATCATTCAAATA                                                |                     |           |                                 |
| Yy1-bs-7 | Yy1-25                                                | TTTTTTTGTAGTGATTGGGTTATAGAAGTT                                                                   | 1st primer          | 358       | chr7: 6727253-6727611           |
|          | Yy1-26                                                | ATAACACATCCACAATAAAAAATCAAACA                                                                    | 2nd primer (Nested) | 346       | chr7: 6727265-6727611           |
|          | Yy1-25<br>Yy1-26.bis (for KO)<br>Yy1-26.1 (for WT)    | TTTTTTTGTAGTGATTGGGTTATAGAAGTT<br>CAATAAAAAATCAAACCAAAATCCATAACTTC<br>CAATAAAAAATCAAACCCCTTATAAC |                     |           |                                 |
| H19-ICR  | H19-ICR-BF3                                           | ATAGATGGTGATAGGGGAGAAAATTTA                                                                      | 1st primer          | 402       | chr7: 142581719-142582121       |
|          | H19-ICR-BR3-nes<br>H19-ICR-BF3                        | AAATTCTACAAAAAACCATACCTATTCTT<br>AGATGGTGATAGGGGAGAAAATTTAATTAGTTGT                              | 2nd primer (Nested) | 398       | chr7: 142581721-142582119       |
|          | H19-ICR-BR3-nes                                       | ATTCTACAAAAAACCATACCTATTCTTAAAC                                                                  |                     |           |                                 |
|          |                                                       |                                                                                                  |                     |           |                                 |

**Supplementary Table 3. Primer sets used for qRT-PCR experiments.**

| Locus        | Name                                 | Sequence (5' -> 3')                                | Primer set | Size (bp) | *Position (mm9, NCBI Build 37) |
|--------------|--------------------------------------|----------------------------------------------------|------------|-----------|--------------------------------|
| Peg3         | Peg3-RT-1a<br>Peg3-RT-1b             | GGTTCAGTGTGGGTGCACTAGACT<br>GCTCACACCAAGGGCTTGAGCG | 1st primer | 222       | chr7:6,671,201-6,683,038       |
| Usp29        | Usp29-RT-1a<br>Usp29-RT-1c           | GAGGAGAGCAAGCAGGTAGATTAC<br>GTTGAAATGGGGAGTAGGGTGA | 1st primer | 545       | chr7:6683856-6690299           |
| Zim1         | Zim1-RT-c<br>Zim1-RT-d               | GATCACCAGGTTGGAGCAAGGAGT<br>AGCGCTCTGTGGTGTGTAGTTG | 1st primer | 305       | chr7:6630678-6634867           |
| Zim2         | Zim2-17<br>Zim2-RT-19                | GCTCAGGACCTGCGCTTTCAG<br>GGGCTGCCAAGATCAATGCTG     | 1st primer | 211       | chr7:6605023-6611658           |
| Zim3         | Zim3-RT-a<br>Zim3-RT-b               | GCCAGGCATAGCGGTACTTGCCT<br>CAGTCATCTGTCACTCACAGA   | 1st primer | 438       | chr7:6925908-6929182           |
| Zfp264       | Zfp264-RT-Pol-b<br>Zfp264-RT-Pol-b.1 | CTGGGCATGAAAAGATCCACT<br>CCACATTTGTTGCACTGGTGGAT   | 1st primer | 337       | chr7:6941897-6942125           |
| Actin (beta) | bActin-1a<br>bActin-1b               | GAGCACCTGTGCTGCTCACCGA<br>CTCTTTGATGTCACGCACGATTC  | 1st primer | 345       | chr5:143,666,183-143,666,981   |

**Supplementary Table 4. Primer sets used for CHIP Assay**

| Locus    | Sequence (5' -> 3') | Sequence (5' -> 3')                           | Primer set | Size (bp) | *Position (mm9, NCBI Build 37)       |
|----------|---------------------|-----------------------------------------------|------------|-----------|--------------------------------------|
| Peg3-DMR | YY1-01a<br>YY1-01b  | GTCCTGTTACAAGACCACAC<br>CTGGGTGGAGCCGAAAGTATC | 1st primer | 284       | <a href="#">chr7:6682313-6682596</a> |
| Peg3-DMR | YY1-23a<br>YY1-23b  | AAAGATGCACCCAGTTGTC<br>CGGGCGACATTTTAACTC     | 1st primer | 270       | <a href="#">chr7:6681801-6682070</a> |
| Peg3-DMR | YY1-34a<br>YY1-34b  | CTACCCTGACGCCATCTTTG<br>GATGACACCCGCTGAGAAT   | 1st primer | 205       | <a href="#">chr7:6681263-6681467</a> |
| Peg3-DMR | YY1-45a<br>YY1-45b  | TCACTGAAGGTGCCATTTTG<br>CAGAGCTCCTGCTCATTCT   | 1st primer | 300       | <a href="#">chr7:6680693-6680992</a> |
| Peg3-DMR | YY1-56a<br>YY1-56b  | CAGTAGAGGCAGGCAAGAGG<br>ACTGGCGGAATGAATACCAAG | 1st primer | 250       | <a href="#">chr7:6680232-6680481</a> |

Original images for Fig.3A

Original images for Fig.5C

Sperm  
H19 ClaI & mPeg3-pro FokI

Sperm (6month)  
Yy1-bs-7 (TaqI)

Somatic DNA  
H19, Peg3-pro, Yy1-bs-2

MEFs COBRA  
mPeg3-pro & Yy1-bis-7

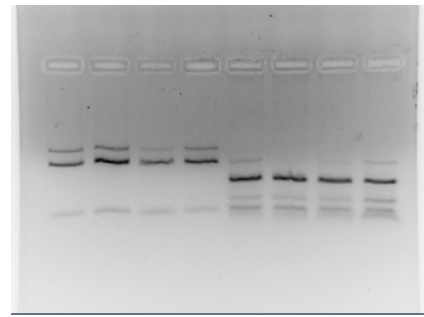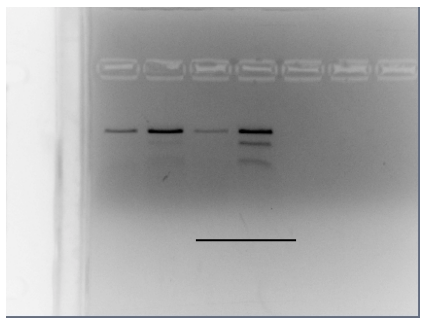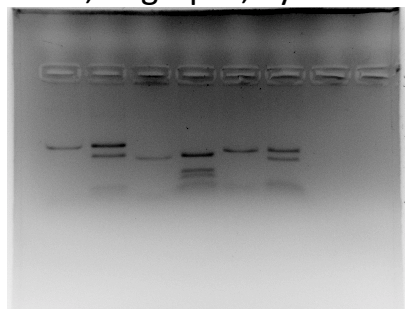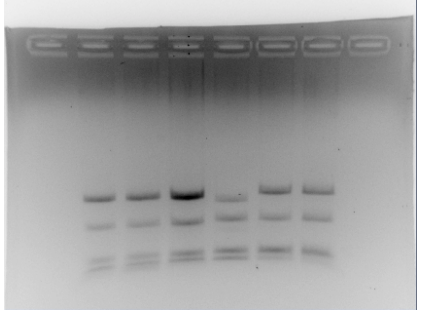

Sperm  
Yy1-bs-2 & Yy1-bs-4

Egg  
Yy1-bs-2 & Yy1-bs-4

Somatic DNA Sperm  
Yy1-bs-4, 7 & Peg3-pro TaqI

MEFs COBRA  
Yy1-bs-2 & Yy1-bs-4

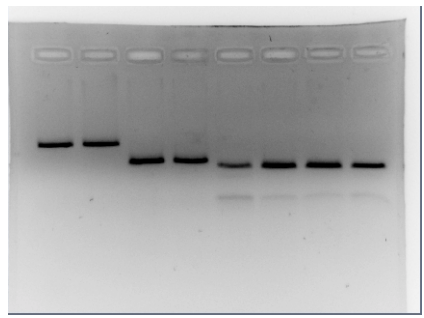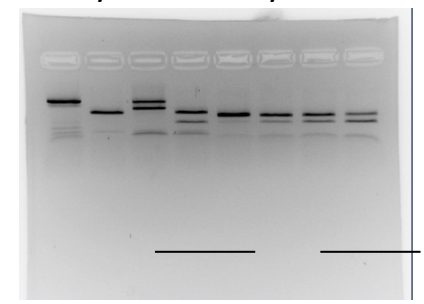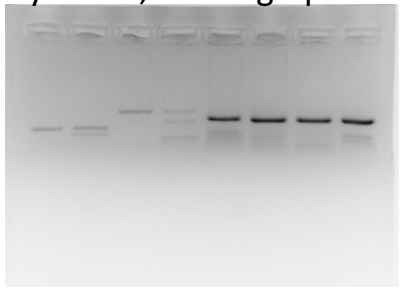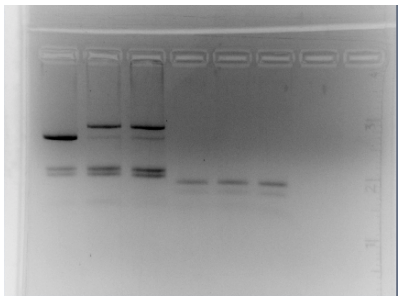

Sperm Egg  
Yy1-bs-7 H19 & mPeg3-pro

Egg  
Yy1-bs-4 (BstUI)- middle set

Sperm  
Yy1-bs-7 new one

MEFs COBRA  
mZim2 & Zfp264

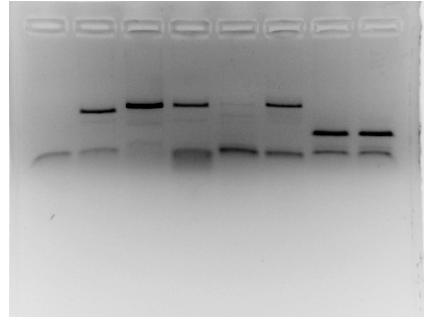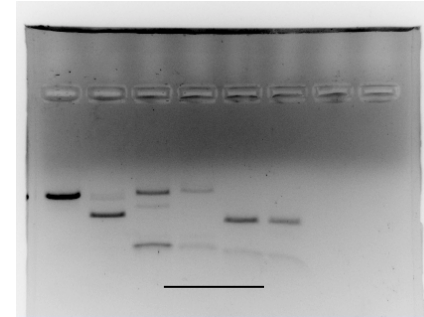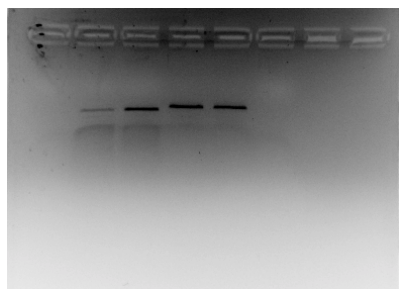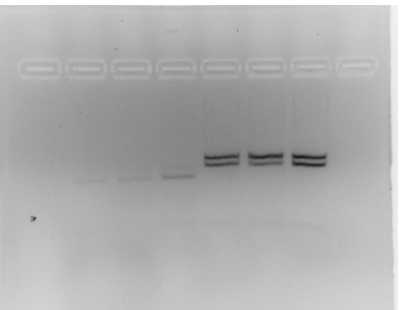

Control PCR reactions for bisulfite-converted DNA

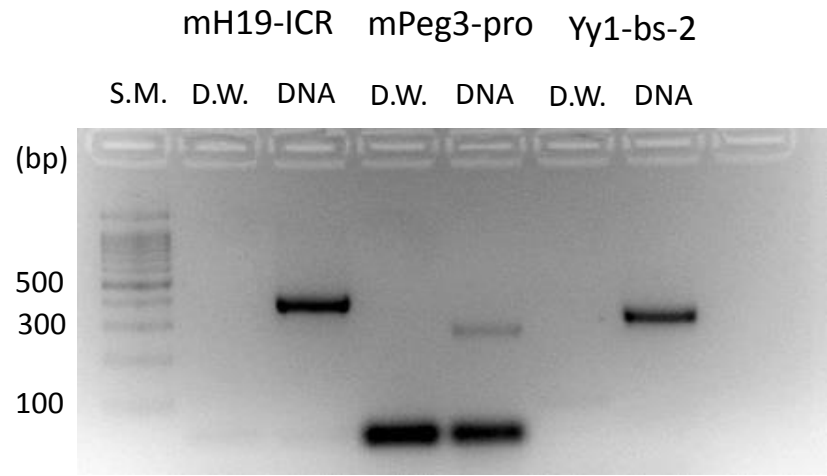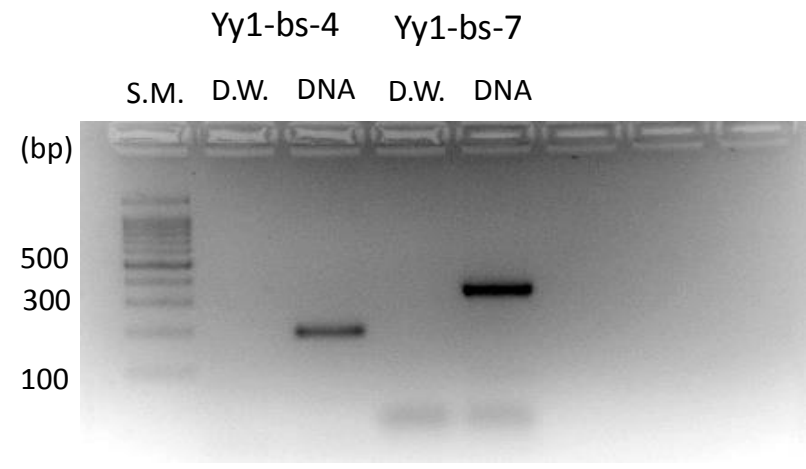

Control COBRA experiments

S.M.: Size Marker  
D.W.: Distilled Water

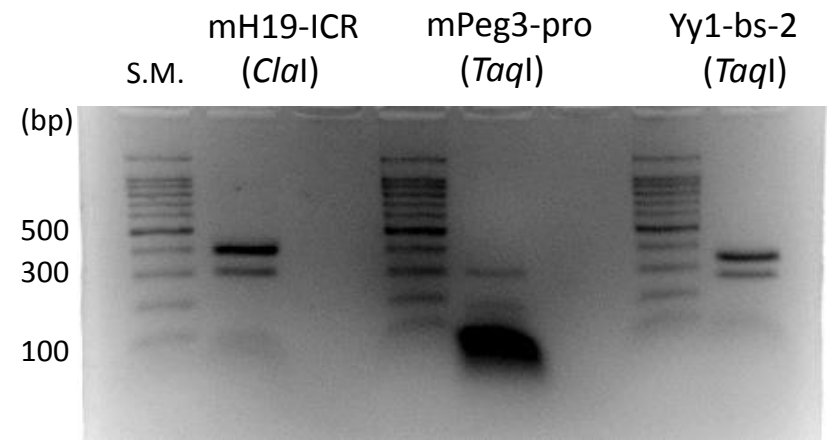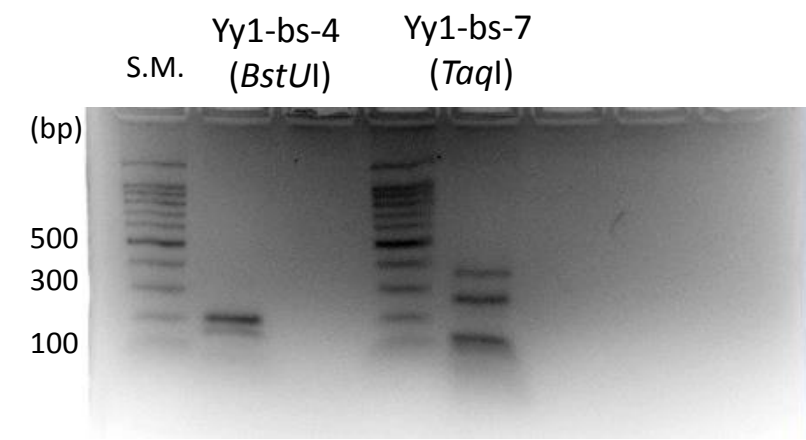

Supplement: 41598_2017_6817_MOESM1_ESM.pdf [file 41598_2017_6817_MOESM1_ESM.pdf]
